# Supplementary material for: Comparative transcriptome analysis between csrA -disruption Clostridium acetobutylicum and its parent strain
Source: Royal Society of Chemistry journal article supplement (doi:10.1039/c4mb00600c), 2015-03-26
Supplement: c4mb00600c1.pdf [file c4mb00600c1.pdf]

### Supplementary materials:

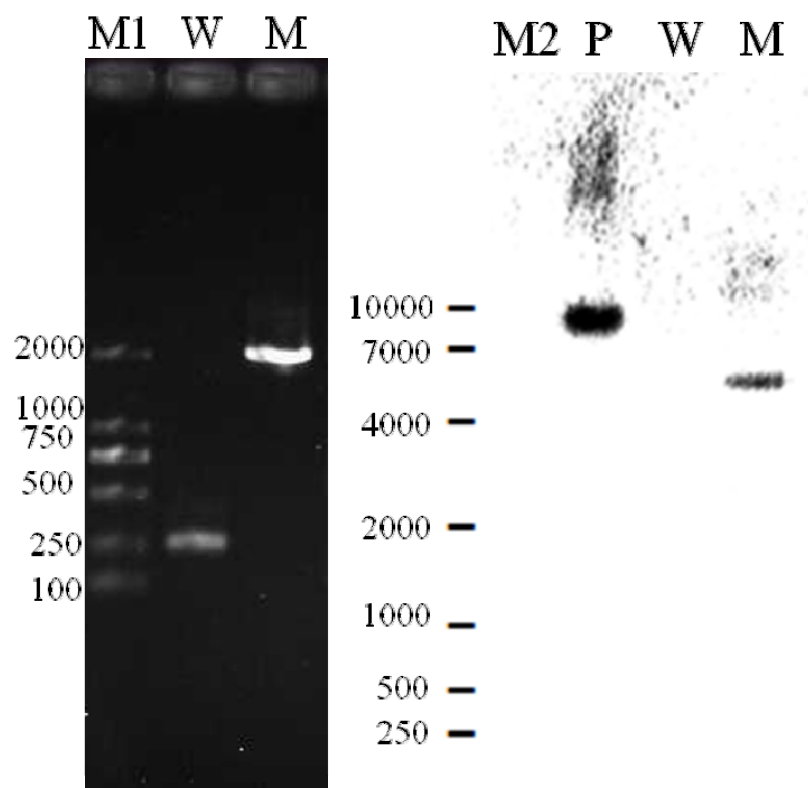

**Figure S1** The mutagenesis for *csrA*. A, The generation of integrant; B, Southern blot testing; M1, DL2000; M2, DL10000; W, wild type; M,  $\Delta csrA$  strain; P, pMTL007C-E2.

**Supplementary Table S1** Oligonucleotide primers used in this study

| Primer name        | Sequence (5'-3')                                                | Description                                   |
|--------------------|-----------------------------------------------------------------|-----------------------------------------------|
| Cac-csrA-97s-IBS   | AAAAAAGCTTATAATTATCCTTATCTGTCAAATAGTGCG<br>CCCAGATAGGGTG        | csrA ClosTron primer                          |
| Cac-csrA-97s-EBS1d | CAGATTGTACAAATGTGGTGATAACAGATAAGTCAAAT<br>AGCTAACTTACCTTTCTTTGT | csrA ClosTron primer                          |
| Cac-csrA-97s- EBS2 | TGAACGCAAGTTTCTAATTTTCGGTTACAGATCGATAGAGG<br>AAAGTGTCT          | csrA ClosTron primer                          |
| csrA -ID-for       | TAAAGGAGTGACTTAAATGT                                            | Screening primer                              |
| csrA -ID-rev       | CTCGTTTTATACTTATTTCTTTAG                                        | Screening primer                              |
| EBS universal      | CGAAATTAGAACTTGC GTTCAGTAAAC                                    | Universal ClosTron primer                     |
| SalI-R1            | ATTACTGTGACTGGTTTGCACCACCCTCTTCG                                | Used for generation of<br>Southern blot probe |
| Cac- csrA -Not/F   | ATAAGAATGCGGCCGCTTATGTTAAGGCAGACTATGAAG                         | <i>csrA</i> promoter forward<br>primer        |
| Cac- csrA -NcoI/R  | GGCCATGGTTATTTCTTTAGAGTTAATTCCTT                                | <i>csrA</i> reverse primer                    |
| lacZ_ NheI/F       | AAAAAAGCTAGCATGAGAAAGATTATTCCTATTA                              | <i>lacZ</i> forward primer                    |
| lacZ_ NcoI/R       | AAAAAACCATGGTTATTCAACTTTTATCATTAC                               | <i>lacZ</i> reverse primer                    |
| Cac- rib_ Pst I/ F | AAAAAACTGCAGGAATCTATAGAATCTAAAAG                                | Riboflavin forward primer                     |
| Cac- rib_ Nhe I/ R | AAAAAAGCTAGCGCAAATAAAAAAATCTCCAA                                | Riboflavin reverse primer                     |
| Cac- spo_ Pst I/ F | AAAAAACTGCAGAGAAACAATAAGAGTTGATAC                               | Spore forward primer                          |
| Cac- spo_ Nhe I/ R | AAAAAAGCTAGCGAAAAGATATCTTCAAGGTTTCAT                            | Spore reverse primer                          |
| Cac- fla_ Pst I/ F | AAAAAACTGCAGTTATCTAAAAATTTTATAAAAAC                             | Flagellar forward primer                      |
| Cac- fla_ Nhe I/ R | AAAAAAGCTAGCATACTGCTCACATCCATCAT                                | Flagellar reverse primer                      |
| Cac- fru_ Pst I/ F | AAAAAACTGCAGGAGAGATAAATAATATGCTG                                | Fructose PTS forward primer                   |
| Cac- fru_ Nhe I/ R | AAAAAAGCTAGCACTAATATTACATATCTCAT                                | Fructose PTS reverse primer                   |
| Cac- Fe_ Pst I/ F  | AAAAAACTGCAGCAATAATATAAATGAGATAAAAAG                            | Ferric uptaking forward<br>primer             |
| Cac- Fe_ Nhe I/ R  | AAAAAAGCTAGCAGACCTATACCTTTTGTTCAT                               | Ferric uptaking reverse<br>primer             |
| CA_C0712RT/F       | CGGACTAAGCGTAGGACTTC                                            | CA_C0712 qRT-PCR primer                       |
| CA_C0712RT/R       | TTATCTTTGTAAGCGATTGA                                            |                                               |
| CA_C1347 RT/F      | AGTAACAACCTAATCCTTCCCTT                                         | CA_C1347 qRT-PCR primer                       |
| CA_C1347 RT/R      | TATCATTCCTTCAGCGTCTA                                            |                                               |
| CA_C2612 RT/F      | CGAGTAAGTGGTGGAGGTGC                                            | CA_C2612 qRT-PCR primer                       |
| CA_C2612 RT/R      | TATTGCTACGCCAAGTGCTG                                            |                                               |
| CA_C3635 RT/F      | TTCAGGAGGAACTTGGACTT                                            | CA_C3635 qRT-PCR primer                       |
| CA_C3635 RT/R      | GGGTGAAGCGGATTATTGTA                                            |                                               |
| CA_C3181 RT/F      | CTACCGAATACCTTTCCCTT                                            | CA_C3181 qRT-PCR primer                       |
| CA_C3181 RT/R      | GCCGCATTTATCATATTTCC                                            |                                               |
| CA_C1457 RT/F      | ATTTCAAGGATTAGAGGACG                                            | CA_C1457 qRT-PCR primer                       |
| CA_C1457 RT/R      | ACTGCTGTAGTCAAAGGAGA                                            |                                               |
| CA_C2957 RT/F      | TATCAGGTTGTAGCAGATGCAATG                                        | CA_C2957 qRT-PCR primer                       |
| CA_C2957 RT/R      | GCTCCTGCTTCAACGACTGG                                            |                                               |

---

|               |                        |                         |
|---------------|------------------------|-------------------------|
| CA_C0232 RT/F | ACTGACATTATAGATGGAGCAA |                         |
| CA_C0232 RT/R | AACTGGAAC TACCAAACCCT  | CA_C0232 qRT-PCR primer |
| CA_C3288 RT/F | GGAAAGCCAATAAAGCTAAT   |                         |
| CA_C3288 RT/R | TTCTCCACCTGAGAAACCTA   | CA_C3288 qRT-PCR primer |
| CA_C2151 RT/F | ACATGCAAAATGGTAGGTTT   |                         |
| CA_C2151 RT/R | CCTCATCGGTAAGTTCCTTA   | CA_C2151 qRT-PCR primer |
| CA_C0122 RT/F | AATCCAGAGGCTAAGGTGGTA  |                         |
| CA_C0122 RT/R | CAAACGGCTTGGCAATAAAA   | CA_C0122 qRT-PCR primer |
| CA_C0590 RT/F | TTGGAGGAAATCATGCTGAG   |                         |
| CA_C0590 RT/R | TATTCCCGCTTTAACTACCG   | CA_C0590 qRT-PCR primer |
| CA_C2087 RT/F | CTGGAGGGAAAAGAACAACC   |                         |
| CA_C2087 RT/R | TGCTCCTTCTGCCACAACAC   | CA_C2087 qRT-PCR primer |
| CA_C2679 RT/F | ATACTGGGTAAAAGAATATC   |                         |
| CA_C2679 RT/R | TCCCAGCCTTCTCCATACAA   | CA_C2679 qRT-PCR primer |

---

**Supplementary Table S2** Expression profiles of genes involved in flagella assembly.  
FDR = false discovery rate

| Accession | Annotation                                              | FDR       | Folds |
|-----------|---------------------------------------------------------|-----------|-------|
| CA_C2139  | flagella basal body rod protein FlgG                    | 9.09E-63  | -1.1  |
| CA_C2140  | flagella basal body rod protein FlgG                    | 1.17E-32  | -1.2  |
| CA_C2141  | hypothetical protein                                    | 9.26E-06  | -1.6  |
| CA_C2142  | hypothetical protein                                    | 3.40E-39  | -1.1  |
| CA_C2143  | sigma factor of SigD/WhiG family                        | 3.96E-21  | -1.5  |
| CA_C2144  | hypothetical protein                                    | 2.22E-12  | -0.5  |
| CA_C2145  | chromosome partitioning ATPase                          | 1.54E-07  | -0.6  |
| CA_C2146  | flagella biosynthesis regulator FlhF                    | 0.0001315 | -0.26 |
| CA_C2147  | flagella biosynthesis protein FlhA                      | 4.18E-06  | -0.47 |
| CA_C2148  | bifunctional flagella biosynthesis<br>protein FliR/FlhB | 5.53E-05  | -0.97 |
| CA_C2149  | flagella biosynthesis protein FliQ                      | 0.3485852 | -1.0  |
| CA_C2150  | flagella biosynthesis protein FliP                      | 3.55E-06  | -4.37 |
| CA_C2151  | flagella biosynthesis protein FliZ                      | 0.008649  | -3.9  |
| CA_C2152  | flagella protein FliL                                   | 0.0001582 | -1.2  |
| CA_C2153  | flagella protein flbD                                   | 0.0001176 | -1.3  |
| CA_C2154  | flagella hook protein FlgE                              | 7.91E-15  | -0.83 |
| CA_C2155  | hypothetical protein                                    | 4.39E-08  | -1.6  |
| CA_C2156  | flagella hook assembly protein FlgD                     | 1.43E-08  | -1.9  |

|          |                                              |           |       |
|----------|----------------------------------------------|-----------|-------|
| CA_C2157 | flagella hook-length control protein<br>fliK | 9.57E-14  | -1.7  |
| CA_C2158 | flagella protein FliJ                        | 1.90E-06  | -1.5  |
| CA_C2159 | flagella-Type ATPase                         | 2.51E-22  | -1.7  |
| CA_C2160 | flagella assembly protein FliH               | 1.90E-13  | -1.5  |
| CA_C2161 | flagella motor switch protein G              | 2.79E-20  | -1.5  |
| CA_C2162 | flagella MS-ring protein                     | 3.49E-23  | -1.2  |
| CA_C2163 | flagella hook-basal body protein<br>FliE     | 4.97E-07  | -1.2  |
| CA_C2164 | flagella basal body rod protein FlgC         | 9.92E-10  | -1.6  |
| CA_C2165 | flagella basal-body rod protein FlgB         | 1.08E-21  | -1.1  |
| CA_C2166 | nucleoside-diphosphate-sugar<br>epimerase    | 0.0060478 | -0.82 |
| CA_C2167 | flagellin family protein                     | 0.1443435 | 0.31  |

---

**Supplementary Table S3** Expression profiles of genes involved in oligopeptide, PTS and Iron transport system. FDR = false discovery rate

| Accession               | Annotation                                                           | FDR       | Folds |
|-------------------------|----------------------------------------------------------------------|-----------|-------|
| <b>ABC transporters</b> |                                                                      |           |       |
| CA_C3634                | oligopeptide ABC transporter periplasmic substrate-binding component | 3.27E-274 | 1.9   |
| CA_C3635                | oligopeptide ABC transporter ATPase                                  | 9.66E-57  | 2.0   |
| CA_C3636                | oligopeptide ABC transporter ATPase                                  | 8.02E-27  | 1.7   |
| CA_C3637                | oligopeptide ABC transporter permease                                | 1.24E-16  | 1.9   |
| CA_C3638                | oligopeptide ABC transporter permease                                | 6.52E-28  | 1.6   |
| CA_C3628                | oligopeptide ABC transporter ATPase                                  | 0.445426  | -0.11 |
| CA_C3629                | oligopeptide ABC transporter ATPase                                  | 0.098892  | -0.31 |
| CA_C3630                | oligopeptide ABC transporter permease                                | 0.666337  | -0.10 |
| CA_C3631                | oligopeptide ABC transporter permease                                | 0.109226  | -0.46 |
| CA_C3632                | oligopeptide ABC transporter periplasmic substrate-binding component | 2.96E-54  | 0.59  |
| CA_C3633                | hypothetical protein                                                 | 0.283894  | 0.89  |
| CA_C3641                | oligopeptide ABC transporter ATPase                                  | 0.044623  | 0.32  |
| CA_C3642                | oligopeptide ABC transporter ATPase                                  | 0.429352  | 0.29  |
| CA_C3643                | oligopeptide ABC transporter permease                                | 0.719418  | 0.38  |
| CA_C3644                | oligopeptide ABC transporter permease                                | 0.027025  | -1.4  |
| CA_C0177                | oligopeptide transport permease                                      | 0.988522  | -0.01 |
| CA_C0178                | oligopeptide transport permease                                      | 0.000611  | -0.66 |

|          |                                                                                 |           |       |
|----------|---------------------------------------------------------------------------------|-----------|-------|
| CA_C0179 | oligopeptide transport ATP-binding protein                                      | 0.004133  | -0.32 |
| CA_C0180 | oligopeptide ABC transporter ATP-binding protein                                | 0.016131  | -0.48 |
| CA_C2374 | oligopeptide ABC-type transporter permease<br>component OPPC                    | 0.964831  | 0.02  |
| CA_C2375 | oligopeptide ABC-type transporter permease                                      | 0.02043   | -1.3  |
| CA_C2377 | oligopeptide ABC-type transporter periplasmic<br>binding component (frameshift) | 2.51E-07  | -1.2  |
| CA_C3179 | oligopeptide ABC transporter periplasmic binding<br>component                   | 0.657066  | 0.38  |
| CA_C3180 | oligopeptide ABC transporter permease                                           | 0.702929  | -0.43 |
| CA_C3181 | oligopeptide ABC transporter permease                                           | 0.384517  | 0.97  |
| CA_C3182 | oligopeptide ABC transporter ATPase                                             | 0.745794  | 0.38  |
| CA_C3183 | oligopeptide ABC transporter ATPase                                             | 0.98555   | -0.01 |
| CA_C0790 | ferrichrome-binding periplasmic protein FhuD                                    | 8.93E-06  | -1.5  |
| CA_C0791 | ferrichrome ABC transporter ATP-binding protein                                 | 0.0008719 | -1.5  |

#### **Phosphotransferase system (PTS)**

|          |                                                            |           |     |
|----------|------------------------------------------------------------|-----------|-----|
| CA_C0423 | PTS, beta-glucosides specific IIABC component              | 4.33E-21  | 1.5 |
| CA_C1407 | PTS, beta-glucosides-specific transporter subunit<br>IIABC | 1.35E-08  | 1.9 |
| CA_C1457 | PTS, fructose(mannose)-specific transporter subunit<br>IIA | 4.24E-106 | 3.3 |

|                             |                                                               |           |      |
|-----------------------------|---------------------------------------------------------------|-----------|------|
| CA_C1458                    | PTS, fructose(mannose)-specific transporter subunit<br>IIB    | 5.52E-125 | 3.0  |
| CA_C1459                    | PTS, fructose(mannose)-specific transporter subunit<br>IIC    | 6.31E-39  | 2.5  |
| CA_C1460                    | PTS, fructose(mannose)-specific transporter subunit<br>IID    | 2.82E-15  | 1.9  |
| CA_C1461                    | hypothetical protein                                          | 0.0001216 | 1.4  |
| CA_C1462                    | levanase/invertase                                            | 8.86E-77  | 2.1  |
| CA_C1463                    | transcriptional regulator                                     | 9.28E-06  | 3.0  |
| CA_C2956                    | PTS, galactitol/fructose specific transporter subunit<br>IIC  | 2.80E-07  | 2.1  |
| CA_C2957                    | PTS, galactitol/fructose specific transporter subunit<br>IIB  | 1.31E-06  | 3.0  |
| CA_C2958                    | PTS, galactitol/fructose specific transporter subunit<br>IIBC | 8.86E-14  | 2.4  |
| CA_C0231                    | transcriptional regulator of sugar metabolism                 | 2.02E-203 | -1.9 |
| CA_C0232                    | 1-phosphofructokinase                                         | 5.10E-83  | -1.4 |
| CA_C0233                    | PTS, transporter subunit IIA                                  | 2.09E-222 | -1.9 |
| CA_C0234                    | PTS, fructose-specific transporter subunit IIBC               | 0         | -1.3 |
| <b>Iron-uptaking system</b> |                                                               |           |      |
| CA_C1029                    | FeoA-like protein, involved in iron transport                 | 6.22E-24  | -2.0 |
| CA_C1030                    | FeoA-like protein, involved in iron transport                 | 5.94E-08  | -1.2 |
| CA_C1031                    | FeoB-like GTPase, responsible for iron uptake                 | 1.82E-58  | -1.7 |



CA\_C1032

transcriptional regulator

1.16E-18

-1.6

---

**Supplementary Table S4** Expression profiles of genes involved in stage III sporulation and spore coat protein. FDR = false discovery rate

| Accession | Annotation                             | FDR       | Folds   |
|-----------|----------------------------------------|-----------|---------|
| CA_C2086  | stage III sporulation<br>protein AH    | 1.14E-89  | 0.91    |
| CA_C2087  | stage III sporulation<br>protein AG    | 4.67E-156 | 1.7     |
| CA_C2088  | stage III sporulation<br>protein AF    | 6.39E-284 | 1.7     |
| CA_C2089  | stage III sporulation<br>protein AE    | 1.20E-20  | 1.9     |
| CA_C2090  | stage III sporulation<br>protein AD    | 1.03E-05  | 0.84821 |
| CA_C2091  | stage III sporulation<br>protein AC    | 0.0889767 | 0.66    |
| CA_C2092  | stage III sporulation<br>protein SpoAB | 6.34E-106 | 1.7     |
| CA_C2093  | stage III sporulation<br>protein AA    | 1.35E-265 | 1.8     |
| CA_C0613  | spore coat protein<br>CotF             | 1.94E-05  | 0.43    |
| CA_C0614  | spore coat protein<br>CotF             | 6.28E-18  | 0.62    |

|          |                                               |           |      |
|----------|-----------------------------------------------|-----------|------|
| CA_C1335 | spore coat protein F<br>(cof) related protein | 0.435467  | 0.18 |
| CA_C1336 | hypothetical protein                          | 0         | 2.2  |
| CA_C1337 | spore coat protein<br>CotJB                   | 0         | 2.3  |
| CA_C1338 | spore coat protein<br>CotJC                   | 0         | 2.0  |
| CA_C2906 | spore coat protein cotS<br>related            | 0         | 1.7  |
| CA_C2907 | glycosyltransferase                           | 1.40E-12  | 1.4  |
| CA_C2908 | spore coat protein cotS<br>related            | 2.61E-204 | 1.9  |
| CA_C2909 | spore coat protein<br>CotS-like protein       | 2.52E-200 | 2.3  |
| CA_C2910 | spore coat protein cotS<br>related            | 3.01E-202 | 2.4  |

---

**Supplementary Table S5** Expression profiles of genes involved in central carbon

metabolism. FDR = false discovery rate

| Accession                                               | Annotation                                                              | FDR      | Folds |
|---------------------------------------------------------|-------------------------------------------------------------------------|----------|-------|
| <b>EMP pathway</b>                                      |                                                                         |          |       |
| CA_C3021                                                | phosphoglycerate mutase                                                 | 1.83E-13 | -1.3  |
| CA_C0712                                                | phosphoglyceromutase                                                    | 0        | -1.3  |
| CA_P0064                                                | fructose-1,6-bisphosphate aldolase                                      | 4.68E-39 | 1.3   |
| <b>TCA cycle</b>                                        |                                                                         |          |       |
| CA_C2458                                                | 2-oxoglutarate ferredoxin oxidoreductase subunit<br>beta                | 8.14E-17 | -1.1  |
| <b>Pentose phosphate pathway</b>                        |                                                                         |          |       |
| CA_C1347                                                | transaldolase                                                           | 6.04E-97 | 1.3   |
| CA_C2018                                                | aldehyde:ferredoxin oxidoreductase                                      | 3.55E-23 | -1.6  |
| CA_C2973                                                | keto-hydroxyglutarate-aldolase/keto-deoxy-phosph<br>ogluconate aldolase | 2.34E-08 | -1.3  |
| <b>Pentose and glucuronate interconversions pathway</b> |                                                                         |          |       |
| CA_C1341                                                | L-ribulose-5-phosphate 4-epimerase                                      | 6.89E-24 | 1.6   |
| CA_C1342                                                | L-arabinose isomerase                                                   | 5.56E-95 | 1.5   |
| CA_C2612                                                | xylulose kinase                                                         | 3.24E-12 | -1.4  |
| <b>Starch and sucrose metabolism</b>                    |                                                                         |          |       |
| CA_C1664                                                | glycogen phosphorylase                                                  | 1.11E-42 | -0.64 |

|          |                   |          |      |
|----------|-------------------|----------|------|
| CA_C2239 | glycogen synthase | 5.27E-05 | 0.41 |
| CA_P0098 | alpha-amylase     | 7.16E-23 | -1.1 |
| CA_P0168 | alpha-amylase     | 4.12E-18 | 0.47 |

---

**Supplementary Table S6** The expression information of selected genes for qRT-PCR in *ΔcsrA* strain and wild type.

| Gene ID  | Gene function                                                                        | Fold change (log2) |         |
|----------|--------------------------------------------------------------------------------------|--------------------|---------|
|          |                                                                                      | RNA-seq            | qRT-PCR |
| CA_C0712 | phosphoglyceromutase                                                                 | -1.30              | -2.4    |
| CA_C1347 | transaldolase                                                                        | 1.25               | 3.02    |
| CA_C2612 | xylulose kinase                                                                      | -1.37              | -1.53   |
| CA_C3635 | oligopeptide ABC transporter ATPase                                                  | 2.00               | 1.87    |
| CA_C3181 | oligopeptide ABC transporter permease                                                | 0.38               | 0.88    |
| CA_C1457 | PTS, fructose(mannose)-specific transporter subunit IIA                              | 3.35               | 4.48    |
| CA_C2957 | PTS, galactitol/fructose specific transporter subunit IIB                            | 2.97               | 2.68    |
| CA_C0232 | 1-phosphofructokinase                                                                | -1.36              | -1.21   |
| CA_C3288 | Iron-regulated ABC transporter ATPase                                                | -1.27              | -2.19   |
| CA_C2151 | flagellar biosynthesis protein FliZ                                                  | -3.94              | -4.59   |
| CA_C0122 | chemotaxis respons regulator (cheY)                                                  | -1.98              | -2.46   |
| CA_C0590 | riboflavin biosynthesis protein RIBD (pirimidine deaminase and pirimidine reductase) | -1.36              | -2.36   |
| CA_C2087 | stage III sporulation protein AG                                                     | 1.69               | 2.33    |
